# Supplementary material for: High expression of SLC26A6 in the kidney may contribute to renal calcification via an SLC26A6-dependent mechanism
Source: PubMed Central journal article supplement (PMC6034601; doi:10.7717/peerj.5192), 2018-07-03

S1

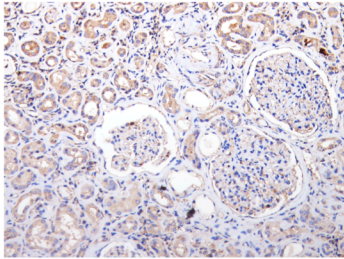

S2

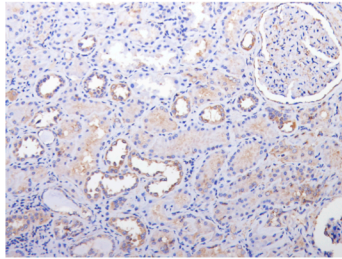

S3

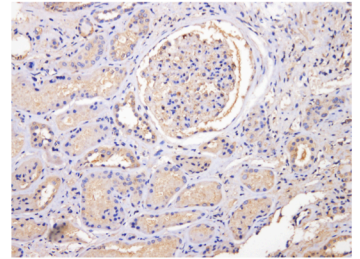

S4

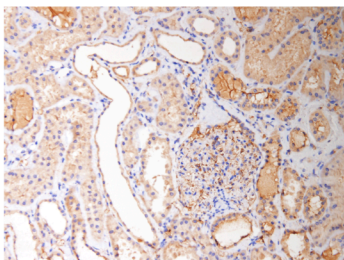

S5

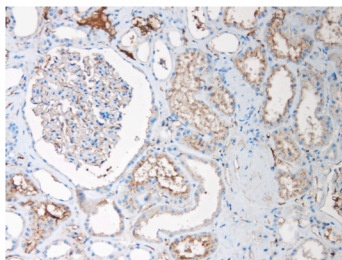

S6

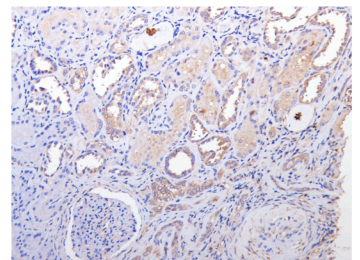

S7

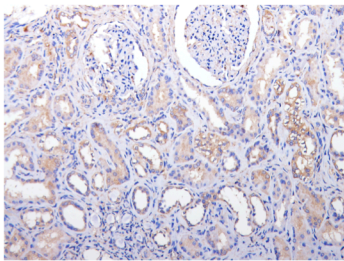

S8

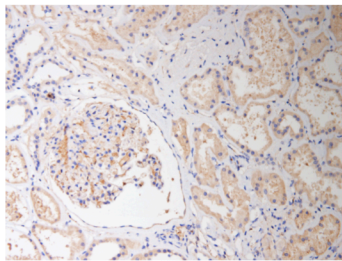

S9

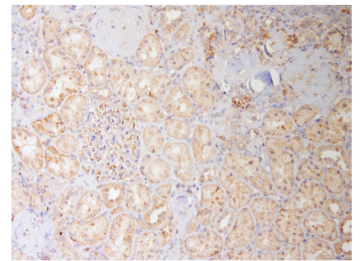

S10

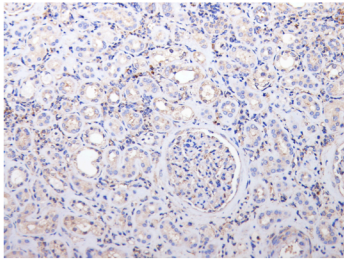

Supplement: peerj-06-5192-s003.pdf [file peerj-06-5192-s003.pdf]
