# Supplementary material for: High expression of SLC26A6 in the kidney may contribute to renal calcification via an SLC26A6-dependent mechanism
Source: PubMed Central journal article supplement (PMC6034601; doi:10.7717/peerj.5192), 2018-07-03

C1

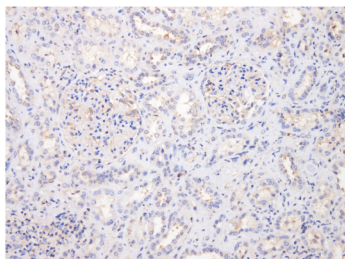

C2

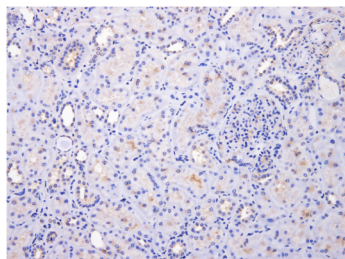

C3

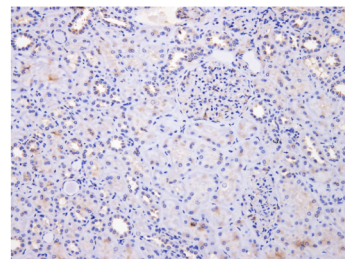

C4

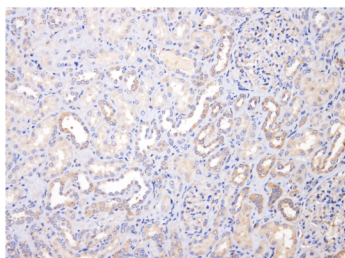

C5

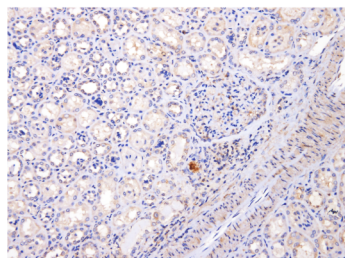

C6

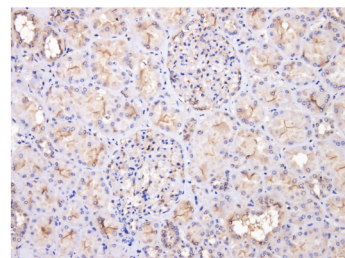

C7

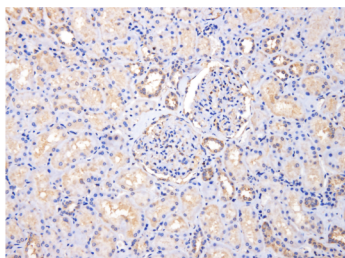

C8

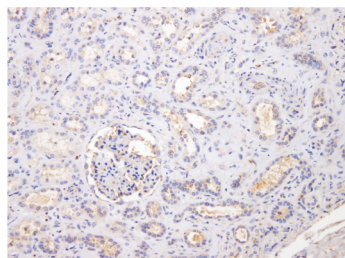

C9

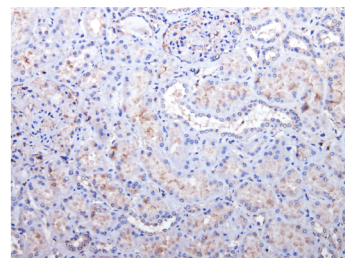

C10

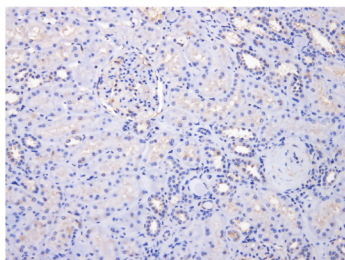

Supplement: peerj-06-5192-s004.pdf [file peerj-06-5192-s004.pdf]
