# Supplementary material for: High expression of SLC26A6 in the kidney may contribute to renal calcification via an SLC26A6-dependent mechanism
Source: PeerJ. 2018 Jul 3;6:e5192. doi: 10.7717/peerj.5192 (PMC6034601; doi:10.7717/peerj.5192)
Supplement: Supplemental Information 1 [file peerj-06-5192-s001.xlsx]

## Sheet: Oxalate
Urine analysis: Oxalate (mg/24h)
No.	Stone former	nonstone former
1	88.51	43.25
2	62.03	34.5
3	67.81	24.23
4	60.38	36.1
5	74.1	20.78
6	44.51	31.43
7	79.64	35
8	63.47	28.5
9	58.63	21.13
10	58.08	41.42

## Sheet: calcium
Urine analysis: calcium (mg/24h)
No.	Stone former	nonstone former
1	241.87	219.32
2	388.64	145.24
3	597.51	167.2
4	382.42	178.21
5	412.2	287.99
6	303.89	331.21
7	248.93	142.22
8	396.51	254.2
9	461.37	269.02
10	392.74	274.31

## Sheet: citrate
Urine analysis: citrate (mg/24h)
No.	Stone former	nonstone former
1	346.07	433.44
2	421.34	554.1
3	259.5	368.32
4	340.3	486.5
5	453.1	518.43
6	298.4	390.5
7	310.4	354.5
8	360.2	459.2
9	354.02	411.13
10	306.01	473.02

## Sheet: magnesium
Urine analysis: magnesium (mg/24h)
No.	Stone former	nonstone former
1	77.42	77.01
2	81.37	110.21
3	82.74	85.09
4	102.08	84.73
5	85.05	96.27
6	88.04	84.21
7	84.41	92.91
8	97.07	96.15
9	68.09	91.24
10	76.04	83.92

## Sheet: P
Urine analysis: P (mg/24h)
No.	Stone former	nonstone former
1	1732.35	786.09
2	791.4	1107
3	942.4	670.53
4	548.63	674.9
5	864.57	632.18
6	1680.47	724.41
7	1562.39	581.16
8	627	873.46
9	601.4	769.35
10	717.89	532.05

## Sheet: pH
Urine analysis: pH
No.	Stone former	nonstone former
1	6	6.5
2	6.5	6.5
3	6.5	6
4	6.5	6
5	6	6
6	7	6.5
7	5.5	6
8	6.5	7
9	5.5	6
10	6.5	6.5

## Sheet: WB for patients
Slc26a6/β-actin expression
Stone former	nonstone former
1.087	0.6
0.788	0.321
0.869	0.372
0.825	0.467
0.952	0.563
0.948	0.531

## Sheet: IHC for patients
Positive area fraction (%)
Stone former	nonstone former
14	20
18	19
21	13
21	14
14	8
21	8
15	10
26	12
25	13
12	15

## Sheet: RFP IF
RFP Positive area fraction (%)
Transfected kidneys	Control kidneys		Transfected duodenum	Control duodenum
24	9		1	1
22	2		1	1
13	6		2	2
19	1		2	1

## Sheet: WB for rats
Slc26a6/β-actin expression of rats' duodenum					Slc26a6/β-actin expression of rats' kidneys
Lentivirus-Slc26a6	siRNA-Slc26a6	Control	Vector		Lentivirus-Slc26a6	siRNA-Slc26a6	Control	Vector
3.24	2.421	2.02	2.993		1.223	0.66	0.896	1.04
2.56	3.1	1.99	2.61		1.41	0.82	1.09	1.31
2.34	2.245	2.24	2.43		1.47	0.678	0.924	0.86
2.14614	3.1422	3.37287	3.64098		1.41034	0.792	1.1476	1.10308

[truncated: 3 more sheets: IHC for rats, oxalate of rats, crystal of rats]
